# Supplementary material for: Automated Workflow for Preparation of cDNA for Cap Analysis of Gene Expression on a Single Molecule Sequencer
Source: PLoS One. 2012 Jan 30;7(1):e30809. doi: 10.1371/journal.pone.0030809 (PMC3268765; doi:10.1371/journal.pone.0030809)
Supplement: Table S3 — Correlation coefficients among replicas and batches. All correlation coefficients among all replicates of THP-1 total RNA prepared by manual and automated process are listed. The top down order of replicates on y-axis is consistent with left-right order of x-axis. The cell color is scale of the values between yellow and green. The maximum and minimal values among them are 0.997 and 0.986, respectively. The average of all replicates is 0.993±0.002. (XLS) [file pone.0030809.s006.xls]

## Sheet: TABLE
THP-1		manual			automation1															automation2
		M1	M2	M3	1C	2C	1A	1B	1E	1F	1G	1H	2A	3A	3B	3C	4A	5A	6A	1A	1B	1C	1E	1F	1G	1H	2A	2C	3A	3B	3C
manual	M1		0.996245	0.996759	0.991682	0.989648	0.99258	0.992514	0.9878	0.992729	0.992521	0.988486	0.99249	0.992957	0.993195	0.992528	0.993543	0.992879	0.991993	0.991594	0.991852	0.993315	0.993477	0.992944	0.991545	0.991679	0.992016	0.993806	0.991666	0.992789	0.993955	M1	manual
	M2			0.997427	0.990622	0.988615	0.991652	0.991752	0.986593	0.992084	0.992033	0.988067	0.991859	0.992433	0.992891	0.99212	0.99291	0.992194	0.99107	0.990066	0.990294	0.992319	0.992568	0.991786	0.989848	0.990797	0.990618	0.993047	0.989986	0.991696	0.993073	M2
	M3				0.991508	0.989292	0.992752	0.992772	0.987349	0.993009	0.992755	0.988601	0.992697	0.993251	0.993687	0.99274	0.993909	0.993143	0.992005	0.99157	0.992057	0.993571	0.993924	0.99308	0.991501	0.991866	0.992078	0.994171	0.991497	0.992963	0.994218	M3
automation1	1C					0.99353	0.993914	0.993565	0.990413	0.993718	0.993666	0.990451	0.99417	0.994105	0.994033	0.993702	0.994351	0.994088	0.994035	0.991623	0.991053	0.993068	0.992395	0.992527	0.991834	0.991929	0.992279	0.992759	0.991907	0.992067	0.992747	1C	automation1
	2C						0.992852	0.992947	0.991545	0.993069	0.993138	0.991195	0.99338	0.993366	0.993248	0.99329	0.992967	0.992616	0.993188	0.989126	0.988334	0.990787	0.989969	0.990222	0.989793	0.989845	0.98999	0.99017	0.989355	0.989744	0.990359	2C
	1A							0.995043	0.991963	0.994976	0.994845	0.991938	0.99499	0.995248	0.995399	0.994553	0.995232	0.994762	0.994371	0.992174	0.99203	0.993609	0.993678	0.992915	0.99256	0.992141	0.992932	0.993137	0.992376	0.992606	0.993629	1A
	1B								0.992368	0.995075	0.995038	0.992688	0.995199	0.995245	0.995443	0.994747	0.9953	0.994788	0.994494	0.991671	0.991364	0.993266	0.993357	0.992776	0.992249	0.99199	0.992587	0.99287	0.991981	0.992232	0.993307	1B
	1E									0.992224	0.992474	0.991492	0.992445	0.992398	0.992446	0.992203	0.991613	0.99131	0.991806	0.98685	0.985966	0.988699	0.988514	0.988036	0.987835	0.987389	0.988182	0.987708	0.987399	0.987374	0.988303	1E
	1F										0.995093	0.99275	0.995125	0.995301	0.995426	0.99489	0.995152	0.994598	0.99433	0.991452	0.991231	0.993239	0.993158	0.992674	0.991967	0.992103	0.992274	0.992879	0.991761	0.992202	0.993251	1F
	1G											0.993036	0.995064	0.995247	0.995415	0.99489	0.995122	0.994627	0.994269	0.991035	0.990654	0.992773	0.992778	0.992321	0.991553	0.99159	0.991984	0.992437	0.991367	0.991769	0.992844	1G
	1H												0.992529	0.992488	0.992735	0.99263	0.992097	0.991403	0.991673	0.986547	0.985798	0.988507	0.988158	0.988016	0.987209	0.987885	0.987699	0.987762	0.986933	0.987271	0.988513	1H
	2A													0.995424	0.995486	0.994871	0.995439	0.995047	0.994719	0.991562	0.991111	0.993212	0.993217	0.992716	0.99211	0.991816	0.992489	0.992782	0.991928	0.992202	0.993087	2A
	3A														0.995737	0.995052	0.995558	0.995217	0.994735	0.991879	0.991695	0.993545	0.993535	0.992995	0.992322	0.992133	0.992684	0.99328	0.992162	0.992516	0.993506	3A
	3B															0.995233	0.995629	0.995263	0.994847	0.991876	0.991686	0.993866	0.993889	0.993224	0.992448	0.992177	0.992902	0.993486	0.992275	0.992717	0.993783	3B
	3C																0.994881	0.99431	0.994131	0.990966	0.990536	0.992657	0.992565	0.992173	0.991406	0.991621	0.991848	0.992366	0.991181	0.991755	0.992621	3C
	4A																	0.995644	0.995086	0.992796	0.992595	0.994244	0.994326	0.993855	0.993116	0.993	0.993619	0.99398	0.993008	0.993405	0.994373	4A
	5A																		0.994886	0.992149	0.991859	0.993612	0.993745	0.99329	0.992494	0.992396	0.993038	0.993522	0.99248	0.992805	0.993715	5A
	6A																			0.991453	0.990964	0.992927	0.992699	0.992507	0.991945	0.991856	0.992341	0.992544	0.991854	0.992107	0.992758	6A
automation2	1A																				0.993549	0.994058	0.994291	0.993642	0.993496	0.992316	0.993546	0.993987	0.993286	0.993492	0.994316	1A	automation2
	1B																					0.994431	0.994781	0.993876	0.993598	0.992517	0.99387	0.994467	0.993413	0.993905	0.994608	1B
	1C																						0.995662	0.995045	0.994248	0.993477	0.99468	0.995521	0.994147	0.994811	0.995698	1C
	1E																							0.995126	0.99456	0.993405	0.995005	0.995761	0.994558	0.994906	0.995907	1E
	1F																								0.993916	0.992993	0.994231	0.995	0.993859	0.99433	0.995162	1F
	1G																									0.992427	0.994036	0.994175	0.993558	0.9937	0.994436	1G
	1H																										0.992864	0.99347	0.992351	0.992876	0.993604	1H
	2A																											0.994551	0.99383	0.994005	0.994804	2A
	2C																												0.994069	0.994892	0.995866	2C
	3A																													0.993622	0.994322	3A
	3B																														0.994973	3B
	3C																															3C
